# Supplementary material for: The beneficial effects of exercise on glucose and lipid metabolism during statin therapy is partially mediated by changes of the intestinal flora
Source: PubMed Central journal article supplement — Biosci Microbiota Food Health. 2022 Feb 21;41(3):112–20. doi: 10.12938/bmfh.2021-024 (PMC9246419; doi:10.12938/bmfh.2021-024), 2022-02-21
Supplement: bmfh-41-112-s001.pdf [file bmfh-41-112-s001.pdf]

**Supplementary Table 1.** General situation of patients in each group (M ± SD, N (%))

|                              | NE group     | NS group     | RS group      | <i>P</i> -value |
|------------------------------|--------------|--------------|---------------|-----------------|
| Gender (male)                | 56 (59.57)   | 170 (59.44)  | 74 (61.16)    | 0.95            |
| Age (years)                  | 68.81 ± 9.39 | 68.58 ± 9.85 | 68.38 ± 10.46 | 0.95            |
| Smoking                      | 44 (46.81)   | 141 (49.30)  | 51 (42.15)    | 0.42            |
| Control diet                 | 84 (89.36)   | 261 (91.26)  | 111 (91.74)   | 0.81            |
| History of hypertension      | 52 (55.32)   | 149 (52.10)  | 59 (48.76)    | 0.77            |
| History of diabetes          | 48 (51.06)   | 170 (59.44)  | 69 (57.02)    | 0.36            |
| Atorvastatin                 | 55 (58.51)   | 172 (60.14)  | 70 (57.85)    | 0.90            |
| Resting heart rate<br>(bpm)  | 71.93 ± 4.51 | 72.80 ± 4.26 | 72.41 ± 4.11  | 0.21            |
| Exercise heart rate<br>(bpm) | /            | 77.76 ± 4.97 | 89.62 ± 5.68  | < 0.01          |

Note: NE:no exercise group;NS:not reached the exercise standard group ;RS:reached the exercise standard group.

**Supplementary Figure 1. Shannon index ( $\alpha$ -diversity) for the different groups of rats.**

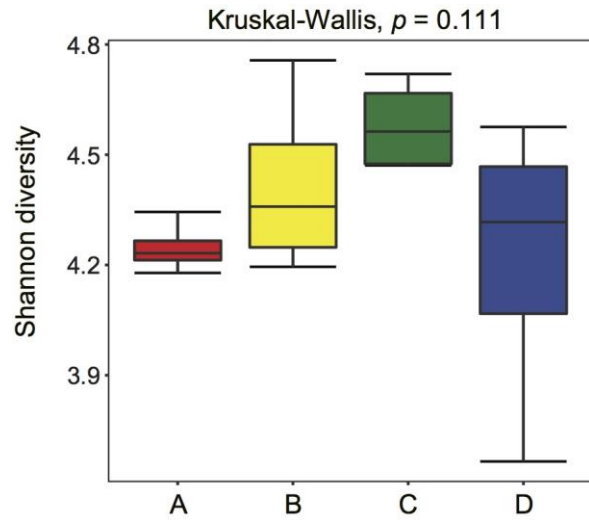

Note: A:Control group;B:Statins group;C: Exercise and statins group;D:Exercise group

**Supplementary Figure 2. Relative abundance of *Akkermansia muciniphila* in the intestinal flora of the four groups of rats after 5 weeks of statin treatment.**

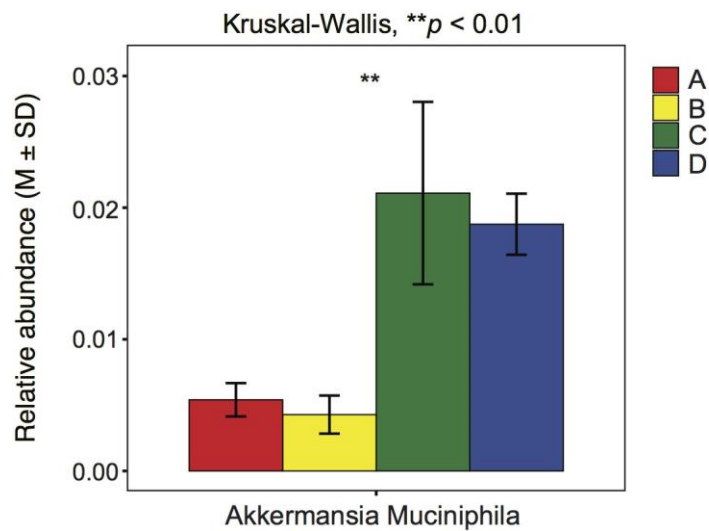

Note: A:Control group;B:Statins group;C: Exercise and statins group;D:Exercise group

**Supplementary Figure 3. LEfSe analysis of the intestinal microbiota of rats in the group C before and after stopping exercise for 5 weeks.**

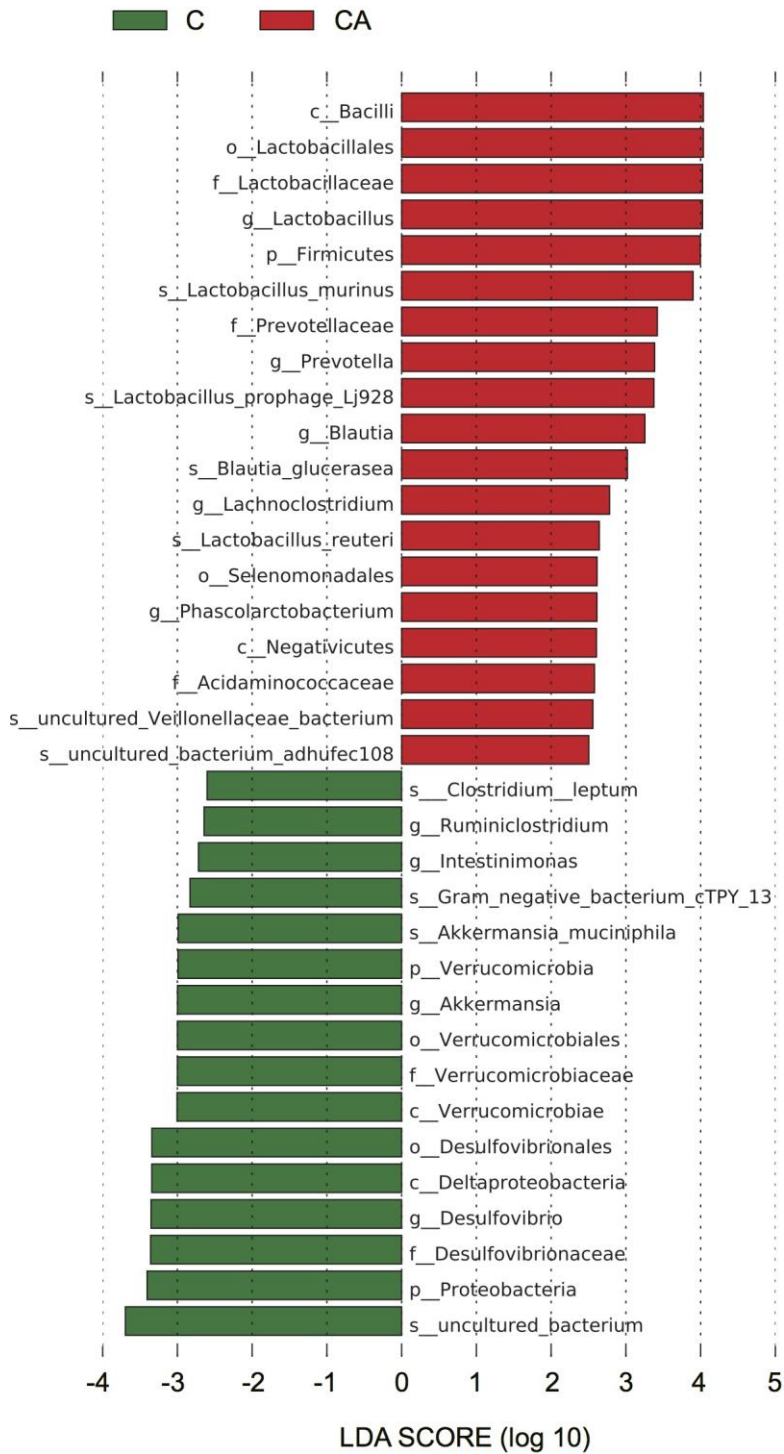

Note: C:Exercise and statins group( group C);CA: group C stopping exercise for 5 weeks
